# Supplementary material for: Development of a Ready-to-Use Oxyresveratrol-Enriched Extract from Artocarpus lakoocha Roxb. Using Greener Solvents and Deep Eutectic Solvents for a Whitening Agent
Source: MDPI journal article supplement (doi:10.3390/cosmetics11020058), 2024-04-05
Supplement: s1 [file s1]

## **Development of ready-to-use oxyresveratrol-enriched extract from *Artocarpus lakoocha* Roxb. using greener solvents, deep eutectic solvents for whitening agent**

**Krittanon Saesue<sup>1</sup>, Pornnapa Thanomrak<sup>1</sup>, Wipawan Prompan<sup>1</sup>, Warakhim Punan<sup>1</sup>, Nantaka Khorana<sup>1,2</sup>, Wasinee Juprasert<sup>3</sup>, Tammanoon Rungsang<sup>1</sup>, Pattravee Thong-on<sup>4</sup>, Jukkarin Srivilai<sup>1\*</sup>**

<sup>1</sup>Research and Innovation Center in Cosmetic Sciences and Natural products, Department of Cosmetic Sciences, School of Pharmaceutical Sciences, University of Phayao, Phayao 56000, Thailand.

<sup>2</sup>Faculty of Pharmacy, Payap University, Chaing Mai 50000, Thailand.

<sup>3</sup>Phitsanuchemical Co. Ltd., Phitsanulok, 65000, Thailand.

<sup>4</sup>Expert centre of Innovative Herbal Products, Thailand Institute of Scientific and Technological Research (TISTR), Phathum Thani, 10120, Thailand.

\*Correspondence: Jukkarin Srivilai, School of Pharmaceutical Sciences, University of Phayao, Phayao 56000, Thailand.  
Telephone No: +66-65-9419787; E-mail: Jukkarin.sr@up.ac.th, Jukkarint@hotmail.com

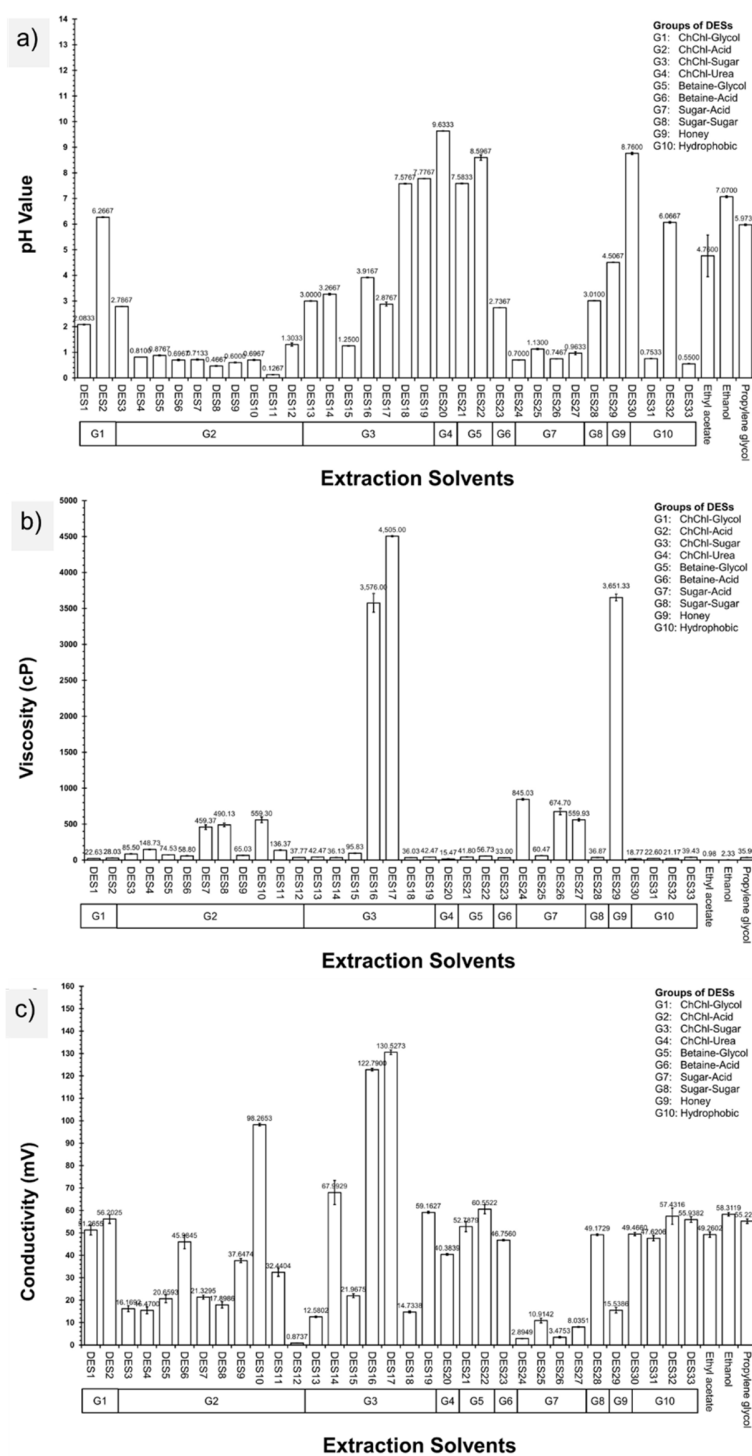

**Figure S1.** Physicochemical Properties of DESs show as The pH value (a), Viscosity (b), and the Conductivity (c) of DESs

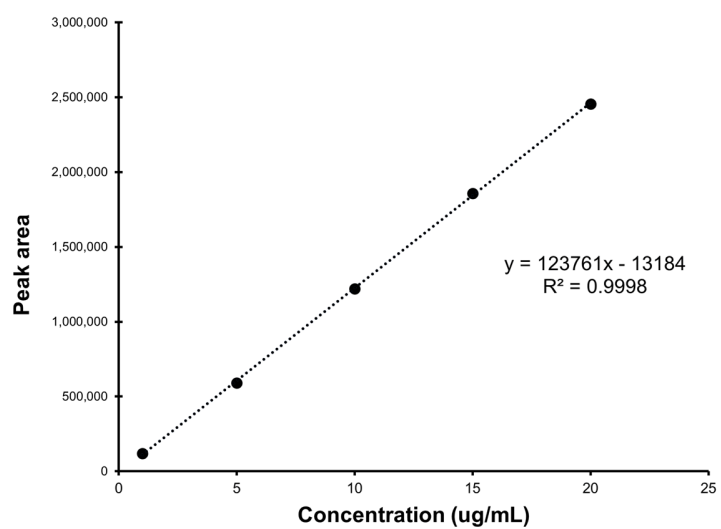

**Figure S2.** Calibration curves of ORV in the concentration range of 1–20 µg/mL

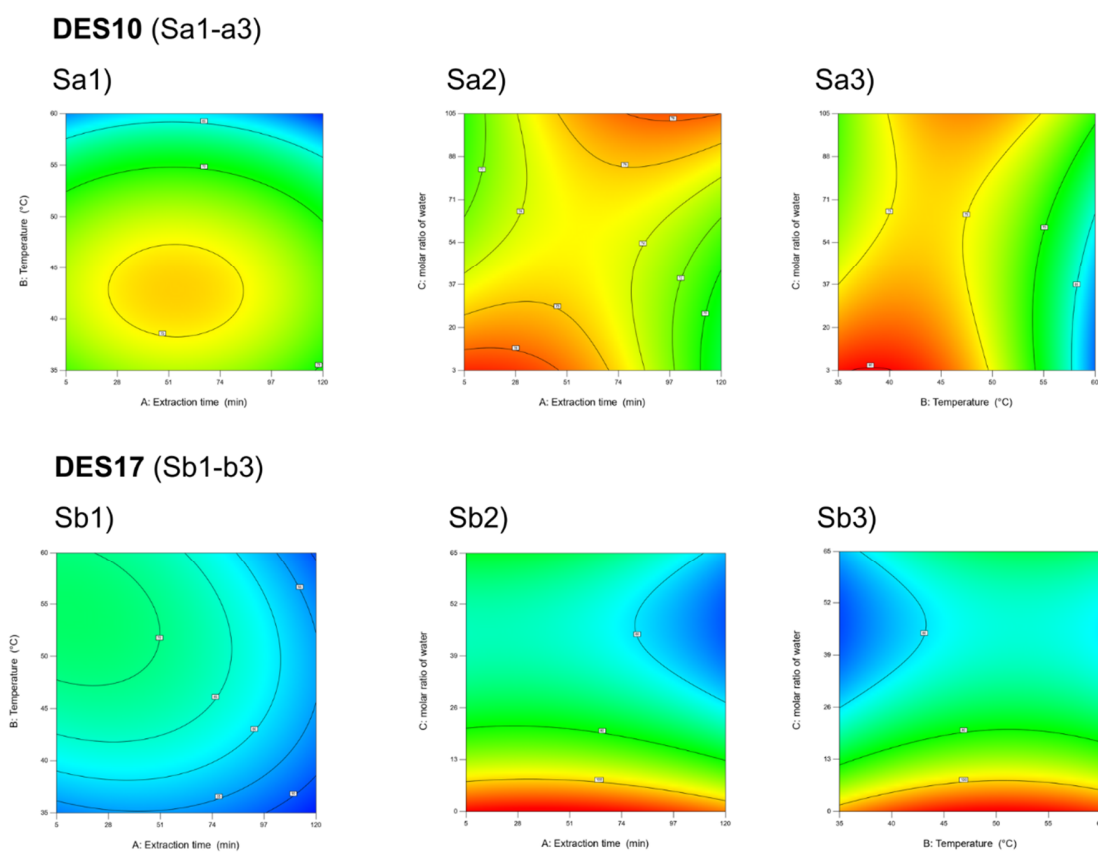

**Figure S3.** Contour plots showing the influences of independent variables on the DES10 (Sa1-a3) and DES17 (Sb1-b3).

### Oxyresveratrol characterization

Oxyresveratrol (**Figure S4**), yellow solid;  $R_f$  0.38 (n-hexane:EtOAc, 3:7); Purity  $99.16 \pm 0.07\%$  (HPLC) (**Figure S5**);  $^1\text{H-NMR}$  (Acetone- $d_6$ , 400 MHz)  $\delta$  ppm : 7.42 (1H, d,  $J = 8.4$  Hz, H-6), 7.35 (1H, d,  $J = 16.4$  Hz, H- $\beta$ ), 6.91 (1H, d,  $J = 16.4$  Hz, H- $\alpha$ ), 6.52 (1H, d,  $J = 2.0$  Hz, H-2' and H-6'), 6.44 (1H, d,  $J = 2.4$  Hz, H-3), 6.39 (1H, dd,  $J = 8.4, 2.4$  Hz, H-5), 6.24 (1H, t,  $J = 2.0$  Hz, H-4') (**Figure S6a, S6b**); IR (ATR)  $\nu_{\text{max}}$   $\text{cm}^{-1}$ : 3209 (OH), 2921 ( $\text{sp}^3$  CH), 1589 ( $\text{C}=\text{C}$  aromatic) (**Figure S7**); -ESI-MS  $m/z$  (% rel. int.): 243.0654  $[\text{M}]^-$ ,  $\text{C}_{14}\text{H}_{12}\text{O}_4$  (**Figure S8**). The characterization information of the isolated compound was confirmed by all spectra as oxyresveratrol, which was consistent with previous report by Arriffin, N. et al (2017). (Arriffin, N.; Jamil, Sh.; Basar, N.; Khamis, S.; Abdullah, A. S.; Lathiff S. M. Phytochemical Studies and Antioxidant Activities of *Artocarpus scortechinii* King. Records of Natural Products 2017, 10, 299-303.)

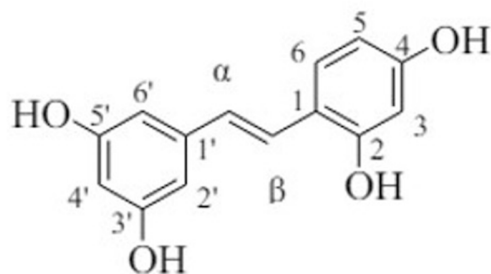

**Figure S4** Chemical structure of oxyresveratrol

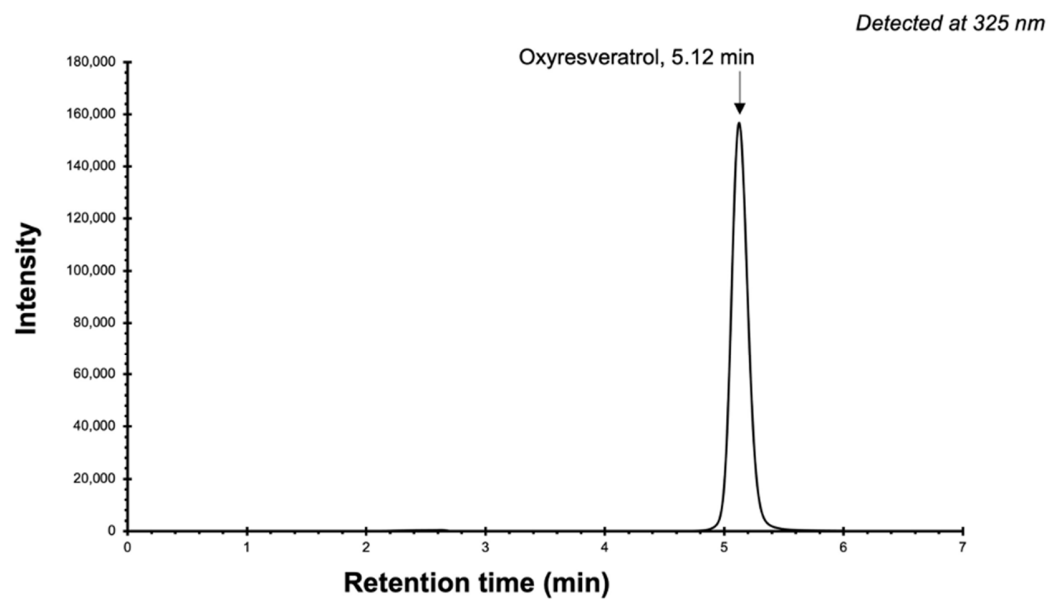

| %Purity report by HPLC analysis |                |           |              |
|---------------------------------|----------------|-----------|--------------|
| Peak                            | Retention time | Peak area | %Peak area   |
| 1                               | 2.563          | 35183     | 0.50         |
| 2                               | 5.126          | 7020991   | <b>99.50</b> |
| Total                           |                | 7056174   | 100.00       |

**Figure S5.** HPLC chromatogram of isolated oxyresveratrol

a) 20240325.1.fid  
Oxyresveratrol in Acetone 25/03/2024 (exp 1)

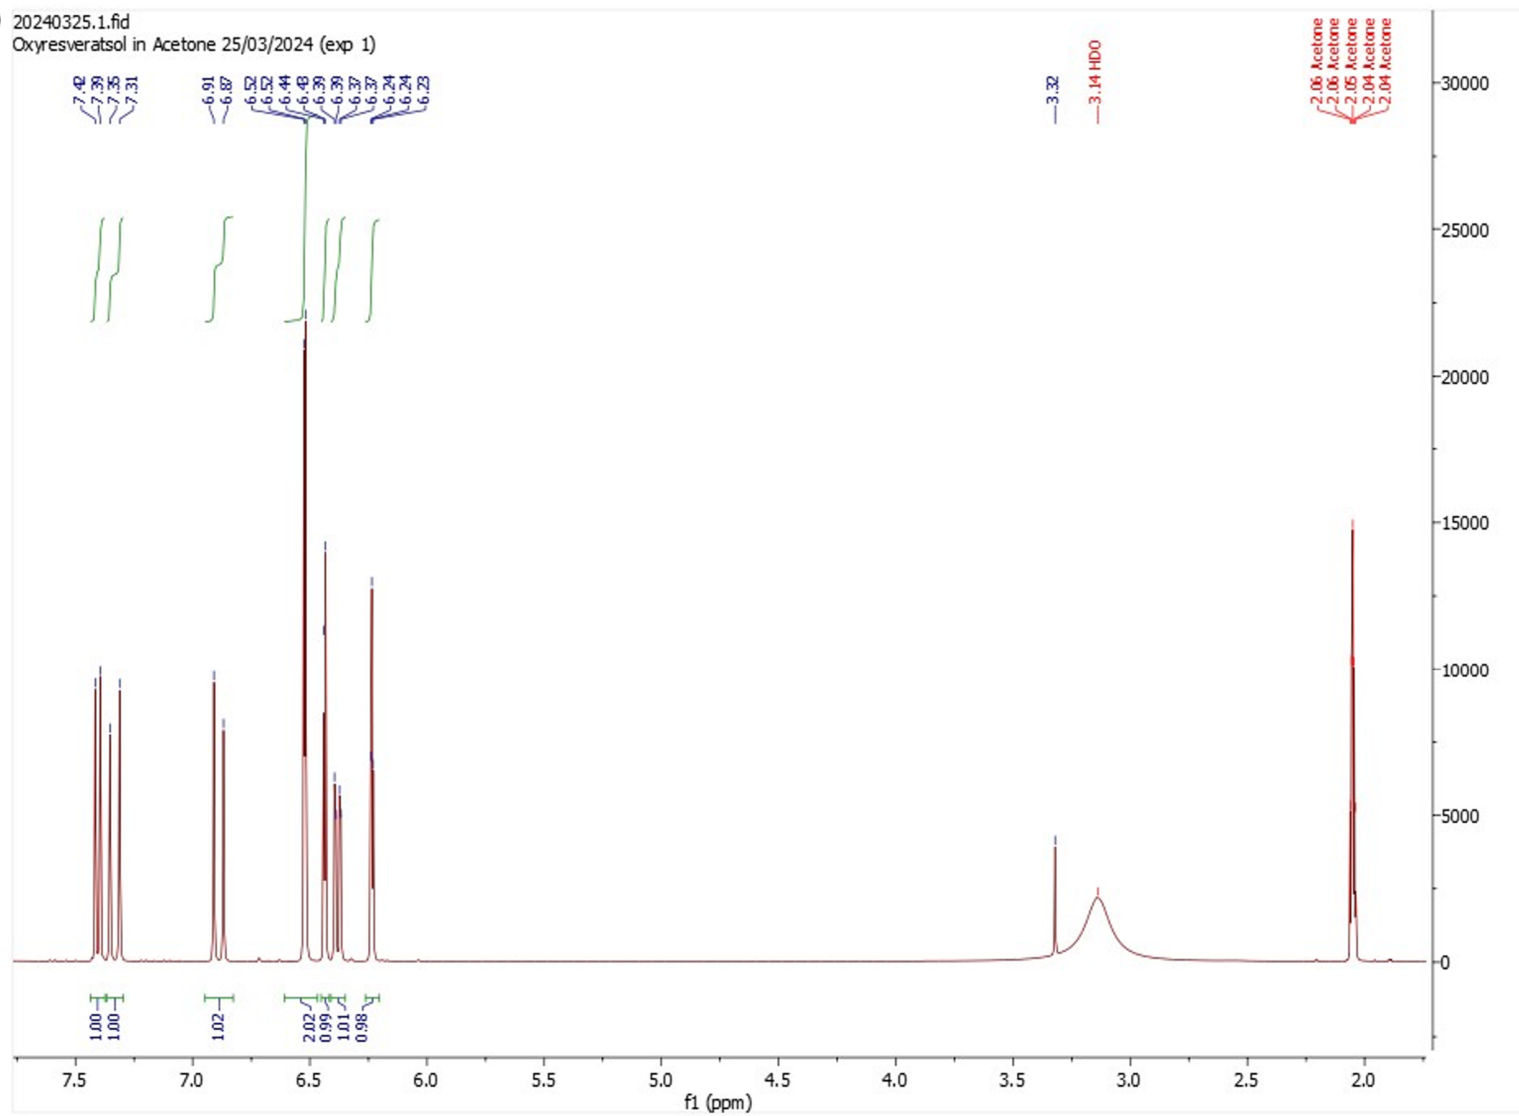

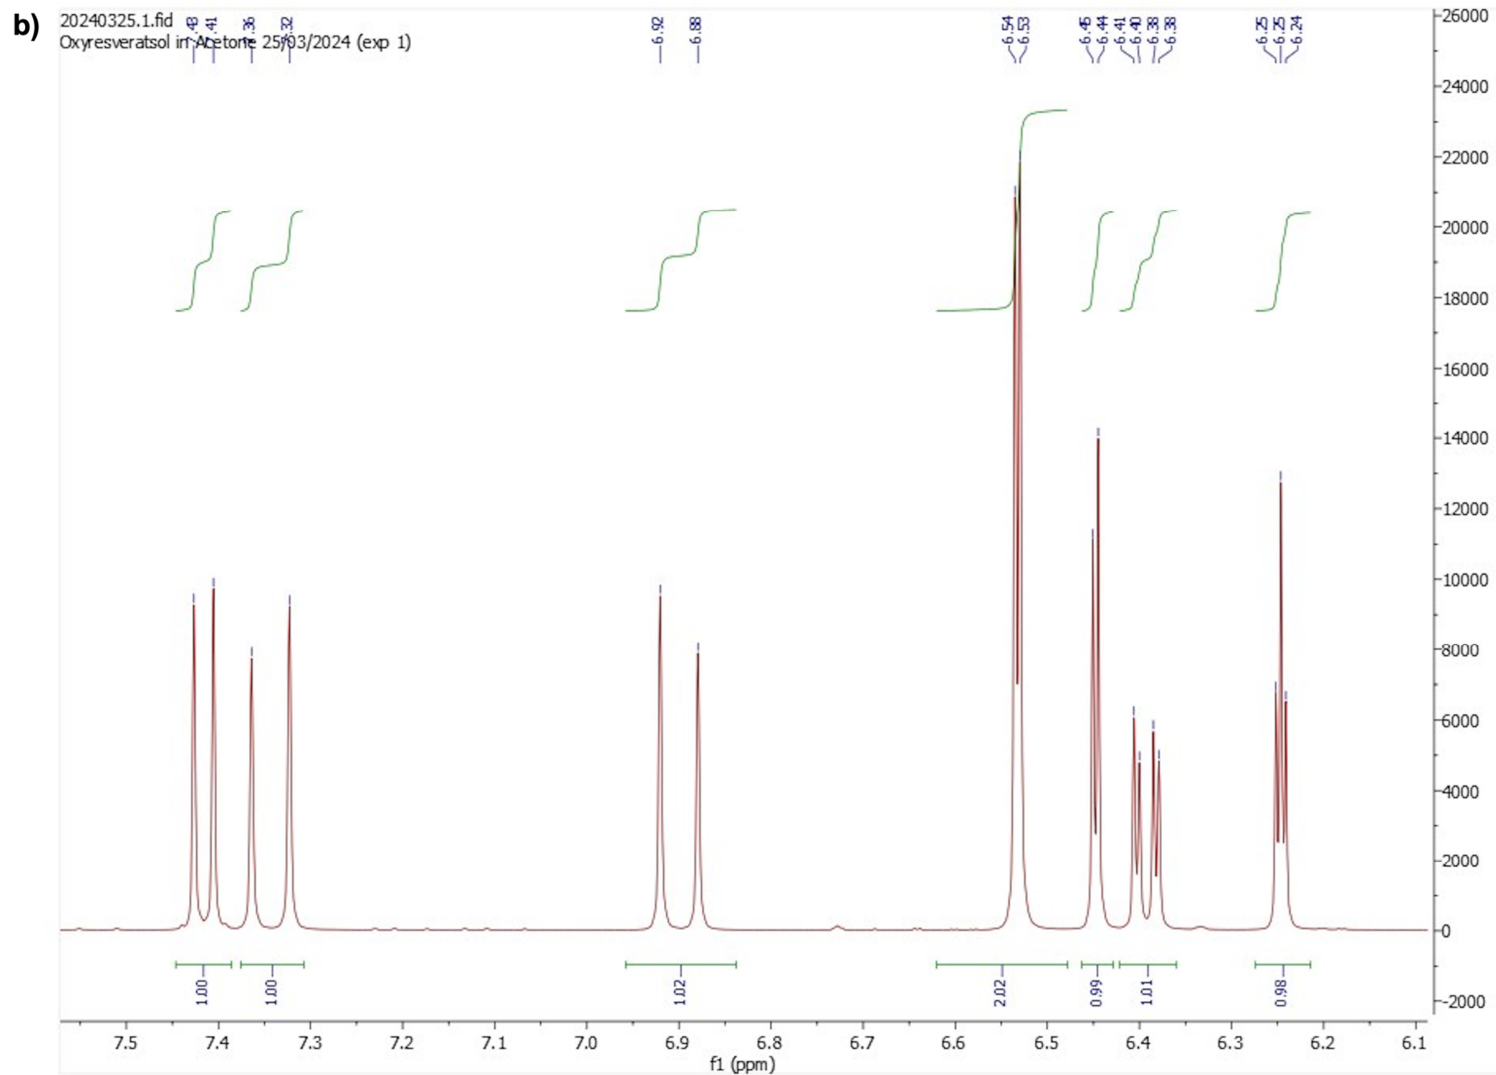

**Figure S6.** (a)  $^1\text{H}$ -NMR spectrum (1.00-8.00 ppm scan) of oxyresveratrol ( $\text{Acetone-d}_6$ , 400 MHz); (b)  $^1\text{H}$ -NMR spectrum (6.00-8.00 ppm scan) of oxyresveratrol ( $\text{Acetone-d}_6$ , 400 MHz).

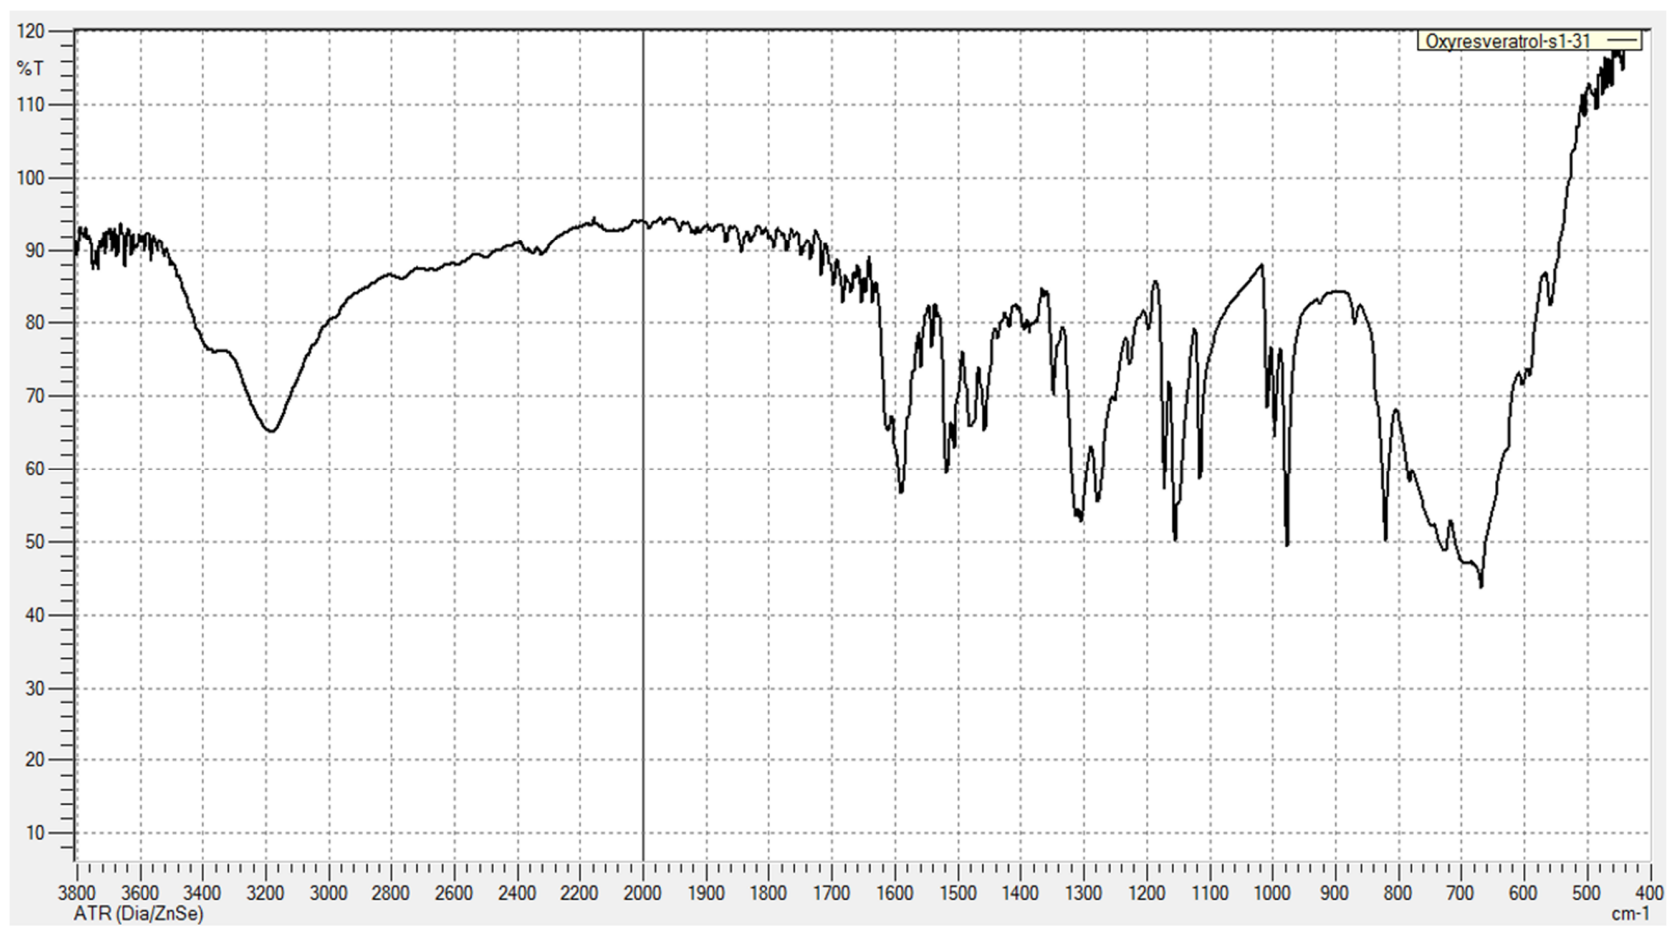

**Figure S7.** IR-spectrum of oxyresveratrol (ATR)



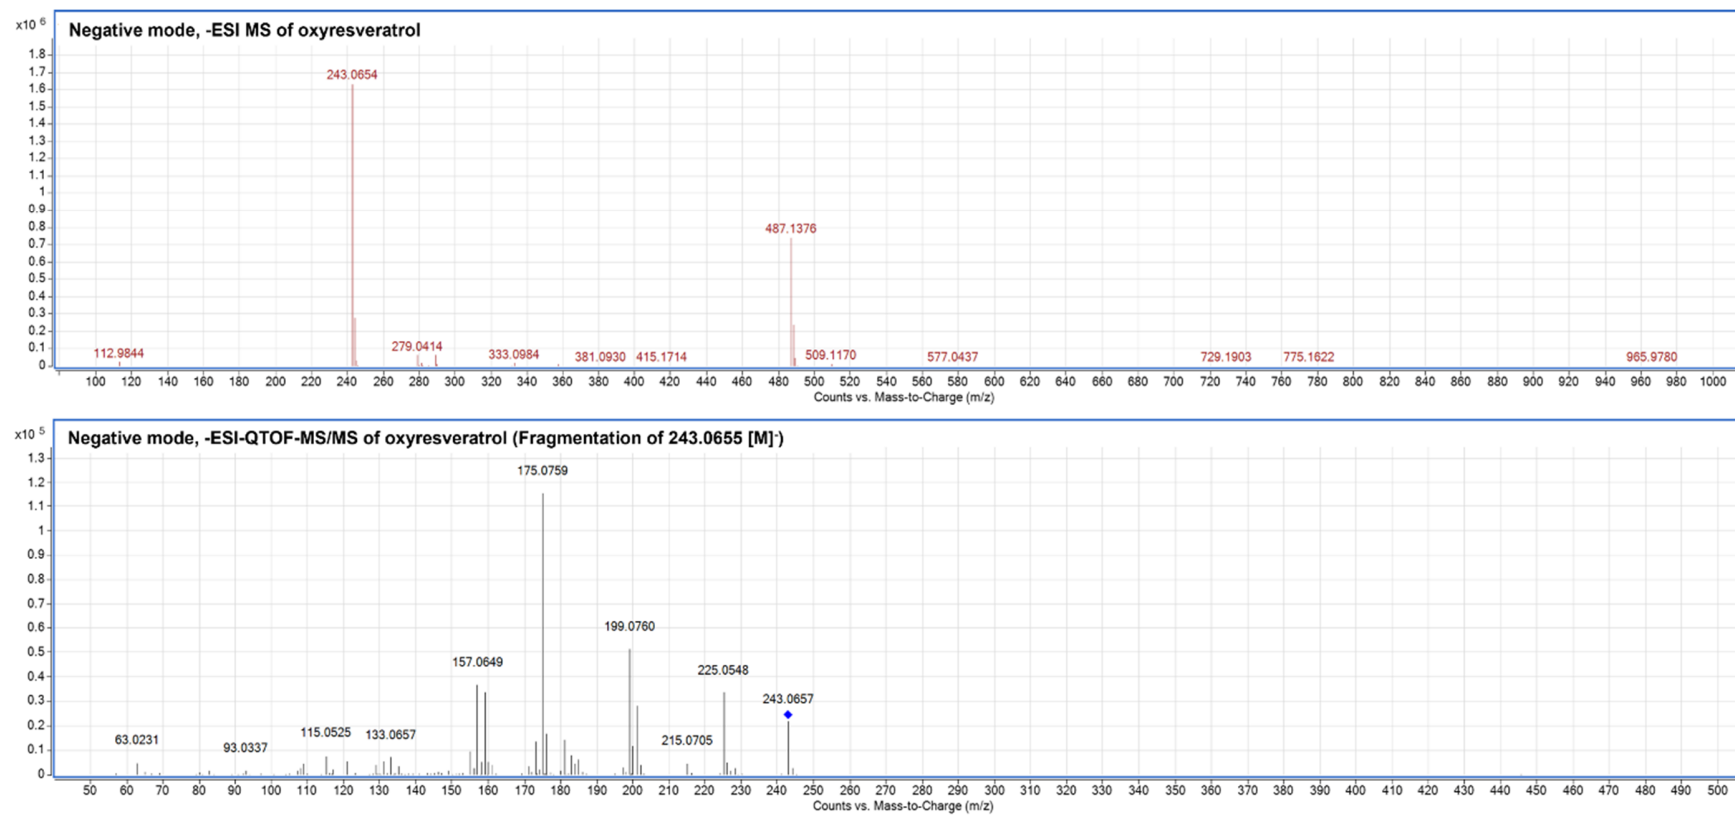

**Figure S8.** Mass spectrum of oxyresveratrol (ESI-MS with negative mode)
